# Supplementary material for: Association of COVID-19 Mitigation Measures With Changes in Cardiorespiratory Fitness and Body Mass Index Among Children Aged 7 to 10 Years in Austria
Source: PubMed Central journal article supplement (PMC8391099; doi:10.1001/jamanetworkopen.2021.21675), 2021-08-26

## Supplementary Online Content

Jarnig G, Jaunig J, van Poppel MNM. Association of COVID-19 mitigation measures with changes in cardiorespiratory fitness and body mass index among children aged 7 to 10 years in Austria. *JAMA Netw Open*. 2021;4(8):e2121675. doi:10.1001/jamanetworkopen.2021.21675

### **eMethods.**

**eTable 1.** Restriction Levels for Children in Austria From January 31, 2020 to September 30, 2020 in Relation to the OxCGRT Stringency Index

**eTable 2.** Overall Sample Characteristics Study Population vs Loss at Follow-up

**eTable 3.** Detailed Sample Characteristics Study Population vs Loss at Follow-up

**eTable 4.** Additional Sample Characteristics for Boys and Girls by Sports Club Membership

**eTable 5.** 3-Way Mixed ANOVAs for 6-min Run SDS Using GMT Reference Values

**eTable 6.** Post-hoc Tests for BMI SDS for the Main Effect Time and Time\*Gender Interaction Based on the Estimated Marginal Means

**eTable 7.** 3-Way Mixed ANOVAs for BMI SDS Using Austrian and WHO Reference Values

**eTable 8.** Cochran's Q Test for Dichotomous BMI Classification Using IOTF, Austrian and WHO Reference Values

**eTable 9.** Post-hoc Tests for Dichotomous BMI Classification Using IOTF, Austrian and WHO Reference Values

**eTable 10.** Cochran's Q Test for Dichotomous BMI Classification Using IOTF, Austrian and WHO Reference Values

**eTable 11.** Post-hoc Tests for Dichotomous BMI Classification Using IOTF, Austrian and WHO Reference Values

**eTable 12.** Children with Overweight and Obesity Using Austrian and WHO Reference Thresholds

**eFigure 1.** COVID-19 Restrictions in Austria Between January 31, 2020 and September 30, 2020

**eFigure 2.** Percentage of Overweight and Obese Children According to IOTF Thresholds for Girls and Boys by Sports Club Membership

This supplementary material has been provided by the authors to give readers additional information about their work.

This supplementary material has been provided by the authors to give readers additional information about their work.

### **eMethods**

To check for robustness of the main outcomes, sensitivity analyses were conducted. Thus, alternative reference values were used for cardiorespiratory fitness (CRF) and body mass index (BMI). The results are presented in the following eTables.

#### **Standardization of the 6-min run**

Based on age- and gender-specific references from the German Motor Test (GMT),<sup>14</sup> standard deviation scores (SDS) were calculated using traditional z-score standardisation (referred to as 6-min run SDS [GMT]).

#### **Standardization of the body mass index**

For national reference values, recent data from a large representative Austrian sample were used.<sup>17,18</sup> The Austrian reference data were calculated using GAMLSS models (see Gleiss et al<sup>18</sup> and Mayer et al<sup>17</sup> for detailed statistical procedure). National reference values are expressed in BMI centile curves (ie, equicurves), representing BMI values corresponding to values at the age of 18 years (hereinafter referred to as EQUI BMI [AUT]). This approach allows BMI thresholds to be on a continuum to those used for adults (ie, overweight BMI  $\geq 25$  kg/m<sup>2</sup>).

For comparison with alternative international reference values, the WHO<sup>19</sup> references were considered, whereas the calculations were based on the LMS method.<sup>20</sup> The WHO reference values are expressed in SDS (referred to as BMI SDS [WHO]), but it uses +1 SDS as a threshold for overweight.<sup>19</sup> Therefore, the dichotomous classification results (underweight and normal weight vs. overweight and obesity) of the particular references were calculated using their given thresholds, respectively.

**eTable 1.** Restriction levels for children in Austria from January 31, 2020 to September 30, 2020 in relation to the OxCGRT stringency index

| <b>Period</b>           | <b>OxCGRT Austria</b> | <b>Sschool structure</b> | <b>Physical education in school</b> | <b>Sports and leisure facilities</b> | <b>Sport at the club</b> | <b>Stay at home requirements</b> |
|-------------------------|-----------------------|--------------------------|-------------------------------------|--------------------------------------|--------------------------|----------------------------------|
| 01-31-2020 – 02-23-2020 | 0                     | 0                        | 0                                   | 0                                    | 0                        | 0                                |
| 02-24-2020 – 03-08-2020 | 11.11                 | 0                        | 0                                   | 0                                    | 0                        | 0                                |
| 03-09-2020 – 03-11-2020 | 19.44                 | 0                        | 0                                   | 0                                    | 0                        | 0                                |
| 03-12-2020              | 34.26                 | 0                        | 0                                   | 0                                    | 0                        | 0                                |
| 03-13-2020 – 03-15-2020 | 48.15                 | 0                        | 0                                   | 0                                    | 0                        | 0                                |
| 03-16-2020 – 04-13-2020 | 81.48                 | 3                        | 3                                   | 3                                    | 3                        | 3                                |
| 04-14-2020 – 04-22-2020 | 77.78                 | 3                        | 3                                   | 3                                    | 3                        | 3                                |
| 04-23-2020 – 04-30-2020 | 75.00                 | 3                        | 3                                   | 3                                    | 3                        | 3                                |
| 05-01-2020              | 67.59                 | 3                        | 3                                   | 1                                    | 3                        | 1                                |
| 05-02-2020 – 05-10-2020 | 64.81                 | 3                        | 3                                   | 1                                    | 3                        | 1                                |
| 05-11-2020 – 05-17-2020 | 59.26                 | 3                        | 3                                   | 1                                    | 3                        | 1                                |
| 05-18-2020 – 05-28-2020 | 59.26                 | 2                        | 3                                   | 1                                    | 3                        | 1                                |
| 05-29-2020 – 06-02-2020 | 53.70                 | 2                        | 3                                   | 1                                    | 2                        | 1                                |
| 06-03-2020              | 50.00                 | 2                        | 3                                   | 1                                    | 2                        | 1                                |
| 06-04-2020 – 07-01-2020 | 47.22                 | 2                        | 3                                   | 1                                    | 2                        | 1                                |
| 07-02-2020 – 07-09-2020 | 47.22                 | 2                        | 3                                   | 0                                    | 0                        | 1                                |
| 07-10-2020 – 09-05-2020 | 35.19                 | 0                        | 0                                   | 0                                    | 0                        | 1                                |
| 09-06-2020 – 09-13-2020 | 36.11                 | 0                        | 0                                   | 0                                    | 0                        | 1                                |
| 09-14-2020 – 09-16-2020 | 36.11                 | 0                        | 0                                   | 0                                    | 0                        | 1                                |
| 09-17-2020 – 09-28-2020 | 37.04                 | 0                        | 0                                   | 0                                    | 0                        | 1                                |
| 09-29-2020 – 09-30-2020 | 40.74                 | 0                        | 0                                   | 0                                    | 0                        | 1                                |

Level 0 = no restrictions or holidays, Level 1 = low restrictions, Level 2 = medium restrictions, Level 3 = high restrictions, OxCGRT = Oxford COVID-19 Government Response Tracker Stringency Index

**eTable 2.** Overall sample characteristics study population vs. loss at follow-up

|                               | <b>Study population</b> | <b>loss at follow-up</b> | <b>X<sup>2</sup></b> | <b>t</b> | <b>P value</b> |
|-------------------------------|-------------------------|--------------------------|----------------------|----------|----------------|
| <b>Age (years)</b>            | 8.3 (0.7)               | 8.1 (0.7)                |                      | 1.22     | .22            |
| <b>Female gender</b>          | 383 (50.1%)             | 36 (61.0%)               | 2.597                |          | .11            |
| <b>Member of sports club</b>  | 322 (42.1%)             | 27 (45.8%)               | 0.293                |          | .59            |
| <b>Urban region</b>           | 451 (59%)               | 34 (58%)                 | 0.045                |          | .83            |
| <b>BMI SDS</b>                | 0.37 (1.08)             | 0.28 (1.13)              |                      | 0.57     | .57            |
| <b>BMI categories (ow+ob)</b> | 155 (20.3%)             | 12 (20.3%)               | 0.000                |          | .99            |
| <b>6-min run (m)</b>          | 917.0 (141.0)           | 854.1 (117.4)            |                      | 3.34     | < .001         |
| <b>6-min run SDS</b>          | 0.49 (1.13)             | 0.02 (0.98)              |                      | 3.09     | .002           |

Sample size for study population, N = 764 (6 min run = 763); for loss at follow up, N = 59.

Data are n (%) or mean (SD). DüMo = 6-min run SDS based on the Düsseldorfer Modell (Stemper et al, 2020), IOTF = BMI SDS based on International Obesity Taskforce reference centile curves (Cole et al, 2012), m = meter, SDS = standard deviation score.

X<sup>2</sup>= Chi-Square Test value; t=test statistic t-test

**eTable 3.** Detailed Sample characteristics study population vs. loss at follow up

|                        |                      | Study population |               | loss at follow-up |               |               |
|------------------------|----------------------|------------------|---------------|-------------------|---------------|---------------|
| Weight (kg)            | sports club total    | n=322            | 29.1 (6.1)    | n=27              | 28.6 (7.1)    |               |
|                        | no sports club total | n=442            | 30.4 (7.9)    | n=32              | 28.6 (7.2)    |               |
|                        | girls                | total            | n=383         | 29.9 (7.1)        | n=36          | 27.1 (6.2)    |
|                        |                      | sports club      | n=119         | 28.7 (6.1)        | n=17          | 26.3 (4.2)    |
|                        |                      | no sports club   | n=264         | 30.4 (7.4)        | n=19          | 27.8 (7.6)    |
|                        | boys                 | total            | n=381         | 29.8 (7.3)        | n=23          | 30.9 (7.9)    |
|                        |                      | sports club      | n=203         | 29.3 (6.1)        | n=10          | 32.4 (9.3)    |
| no sports club         |                      | n=178            | 30.3 (8.5)    | n=13              | 29.7 (6.7)    |               |
| Height (cm)            | sports club total    | n=322            | 132.2 (6.5)   | n=27              | 129.9 (6.2)   |               |
|                        | no sports club total | n=442            | 132.3 (6.7)   | n=32              | 130.5 (8.9)   |               |
|                        | girls                | total            | n=383         | 131.7 (6.8)       | n=36          | 129.8 (7.3)   |
|                        |                      | sports club      | n=119         | 131.3 (6.6)       | n=17          | 130.0 (5.8)   |
|                        |                      | no sports club   | n=264         | 131.9 (6.9)       | n=19          | 130.6 (8.4)   |
|                        | boys                 | total            | n=381         | 132.7 (6.4)       | n=23          | 130.9 (6.4)   |
|                        |                      | sports club      | n=203         | 132.7 (6.3)       | n=10          | 131.5 (6.8)   |
| no sports club         |                      | n=178            | 132.8 (6.5)   | n=13              | 130.5 (6.4)   |               |
| BMI SDS                | sports club total    | n=322            | 0.26 (0.96)   | n=27              | 0.36 (1.05)   |               |
|                        | no sports club total | n=442            | 0.44 (1.16)   | n=32              | 0.22 (1.21)   |               |
|                        | girls                | total            | n=383         | 0.45 (1.08)       | n=36          | -0.02 (1.02)  |
|                        |                      | sports club      | n=119         | 0.27 (0.96)       | n=17          | -0.00 (0.82)  |
|                        |                      | no sports club   | n=264         | 0.54 (1.13)       | n=19          | -0.05 (1.19)  |
|                        | boys                 | total            | n=381         | 0.28 (1.08)       | n=23          | 0.76 (1.15)   |
|                        |                      | sports club      | n=203         | 0.25 (0.96)       | n=10          | 0.96 (1.15)   |
| no sports club         |                      | n=178            | 0.30 (1.20)   | n=13              | 0.61 (1.16)   |               |
| BMI categories (ow+ob) | sports club total    | n=322            | 51 (15.8%)    | n=27              | 5 (18.5%)     |               |
|                        | no sports club total | n=442            | 104 (23.5%)   | n=32              | 7 (21.9%)     |               |
|                        | girls                | total            | n=383         | 91 (23.8%)        | n=36          | 4 (11.1%)     |
|                        |                      | sports club      | n=119         | 20 (16.8%)        | n=17          | 1 (5.9%)      |
|                        |                      | no sports club   | n=264         | 71 (26.9%)        | n=19          | 3 (15.8%)     |
|                        | boys                 | total            | n=381         | 64 (16.8%)        | n=23          | 8 (34.8%)     |
|                        |                      | sports club      | n=203         | 31 (15.3%)        | n=10          | 4 (40.0%)     |
| no sports club         |                      | n=178            | 33 (18.5%)    | n=13              | 4 (30.8%)     |               |
| 6-min run (m)          | sports club total    | n=322            | 966.8 (131.9) | n=27              | 864.5 (124.3) |               |
|                        | no sports club total | n=442            | 880.9 (136.5) | n=32              | 845.3 (112.4) |               |
|                        | girls                | total            | n=383         | 871.2 (121.4)     | n=36          | 837.9 (117.3) |
|                        |                      | sports club      | n=119         | 900.9 (113.4)     | n=17          | 854.9 (118.0) |
|                        |                      | no sports club   | n=264         | 857.8 (122.8)     | n=19          | 822.6 (117.6) |
|                        | boys                 | total            | n=381         | 963.1 (144.5)     | n=23          | 879.5 (115.5) |
|                        |                      | sports club      | n=202         | 1005.5 (126.7)    | n=10          | 880.8 (139.4) |
| no sports club         |                      | n=178            | 915.0 (148.6) | n=13              | 878.5 (99.3)  |               |
| 6-min run SDS          | sports club total    | n=322            | 0.83 (1.05)   | n=27              | 0.15 (1.06)   |               |
|                        | no sports club total | n=442            | 0.24 (1.12)   | n=32              | -0.09 (0.91)  |               |
|                        | girls                | total            | n=383         | 0.40 (1.08)       | n=36          | 0.13 (1.03)   |
|                        |                      | sports club      | n=119         | 0.67 (1.00)       | n=17          | 0.32 (1.03)   |
|                        |                      | no sports club   | n=264         | 0.28 (1.09)       | n=19          | -0.05 (1.02)  |
|                        | boys                 | total            | n=381         | 0.58 (1.17)       | n=23          | -0.14 (0.89)  |
|                        |                      | sports club      | n=202         | 0.93 (1.06)       | n=10          | -0.12 (1.12)  |
| no sports club         |                      | n=178            | 0.19 (1.17)   | n=13              | -0.14 (0.73)  |               |

Sample size for study population, N = 764 (6 min run = 763); for loss at follow up, N = 59.

Data are n (%) or mean (SD). DüMo = 6-min run SDS based on the Düsseldorf Modell (Stemper et al, 2020), IOTF = BMI SDS based on International Obesity Taskforce reference centile curves (Cole et al, 2012), m = meter, SDS = standard deviation score.

X<sup>2</sup>= Chi-Square Test value; t=test statistic t-test, p-lvl (p-value level) \* = P <.05, \* = P <.01, \* = P <.001,

**eTable 4.** Additional sample characteristics for boys and girls by sports club membership

|                                        |                      |                | September 2019 | June 2020   | September 2020 |
|----------------------------------------|----------------------|----------------|----------------|-------------|----------------|
| <b>Age (years)</b>                     |                      |                | 8.3 (0.7)      | 9.0 (0.7)   | 9.2 (0.7)      |
| <b>Female gender</b>                   |                      |                | 383 (50.1%)    |             |                |
| <b>Member of sports club</b>           |                      |                | 322 (42.1%)    |             |                |
| <b>Sports Club Membership, No. (%)</b> | girls                | sports club    | 119 (15.6%)    |             |                |
|                                        |                      | no sports club | 264 (34.6%)    |             |                |
|                                        | boys                 | sports club    | 203 (26.6%)    |             |                |
|                                        |                      | no sports club | 178 (23.3%)    |             |                |
| <b>Urban region</b>                    |                      |                | 451 (59%)      | 451 (59%)   | 451 (59%)      |
| <b>Weight (kg)</b>                     | total                |                | 29.9 (7.2)     | 33.1 (8.5)  | 34.5 (8.9)     |
|                                        | sports club total    |                | 29.1 (6.1)     | 32.1 (7.4)  | 33.4 (7.7)     |
|                                        | no sports club total |                | 30.4 (7.9)     | 33.8 (9.1)  | 35.2 (9.7)     |
|                                        | girls                | total          | 29.9 (7.1)     | 33.1 (8.3)  | 34.5 (8.9)     |
|                                        |                      | sports club    | 28.7 (6.1)     | 31.6 (7.2)  | 32.9 (7.8)     |
|                                        |                      | no sports club | 30.4 (7.4)     | 33.8 (8.7)  | 35.2 (9.3)     |
|                                        | boys                 | total          | 29.8 (7.3)     | 33.1 (8.6)  | 34.4 (9.0)     |
|                                        |                      | sports club    | 29.3 (6.1)     | 32.4 (7.5)  | 33.6 (7.7)     |
|                                        |                      | no sports club | 30.3 (8.5)     | 33.9 (9.7)  | 35.3 (10.2)    |
| <b>Height (cm)</b>                     | total                |                | 132.2 (6.6)    | 136.4 (6.9) | 138.1 (6.9)    |
|                                        | sports club total    |                | 132.2 (6.5)    | 136.3 (6.7) | 138.0 (6.8)    |
|                                        | no sports club total |                | 132.3 (6.7)    | 136.5 (7.0) | 138.2 (7.0)    |
|                                        | girls                | total          | 131.7 (6.8)    | 136.0 (7.1) | 137.8 (7.1)    |
|                                        |                      | sports club    | 131.3 (6.6)    | 135.6 (6.9) | 137.3 (7.1)    |
|                                        |                      | no sports club | 131.9 (6.9)    | 136.2 (7.2) | 138.0 (7.2)    |
|                                        | boys                 | total          | 132.7 (6.4)    | 136.8 (6.6) | 138.4 (6.6)    |
|                                        |                      | sports club    | 132.7 (6.3)    | 136.7 (6.6) | 138.3 (6.6)    |
|                                        |                      | no sports club | 132.8 (6.5)    | 137.0 (6.6) | 138.5 (6.7)    |
| <b>EQUI BMI (AUT)</b>                  | total                |                | 22.2 (3.5)     | 22.6 (3.8)  | 22.7 (3.8)     |
|                                        | sports club total    |                | 21.9 (2.8)     | 22.1 (3.1)  | 22.2 (3.1)     |
|                                        | no sports club total |                | 22.5 (4.0)     | 22.9 (4.2)  | 23.0 (4.3)     |
|                                        | girls                | total          | 22.1 (3.5)     | 22.3 (3.6)  | 22.3 (3.7)     |
|                                        |                      | sports club    | 21.4 (2.7)     | 21.5 (2.9)  | 21.6 (3.1)     |
|                                        |                      | no sports club | 22.4 (3.7)     | 22.6 (3.8)  | 22.7 (3.9)     |
|                                        | boys                 | total          | 22.4 (3.6)     | 22.9 (3.9)  | 23.0 (4.0)     |
|                                        |                      | sports club    | 22.2 (2.8)     | 22.5 (3.1)  | 22.6 (3.0)     |
|                                        |                      | no sports club | 22.6 (4.3)     | 23.3 (4.6)  | 23.5 (4.8)     |
| <b>BMI SDS (WHO)</b>                   | total                |                | 0.35 (1.21)    | 0.50 (1.24) | 0.55 (1.25)    |
|                                        | sports club total    |                | 0.24 (1.08)    | 0.36 (1.15) | 0.40 (1.13)    |
|                                        | no sports club total |                | 0.42 (1.28)    | 0.59 (1.27) | 0.63 (1.29)    |
|                                        | girls                | total          | 0.41 (1.16)    | 0.50 (1.18) | 0.52 (1.23)    |
|                                        |                      | sports club    | 0.22 (1.01)    | 0.26 (1.07) | 0.29 (1.14)    |
|                                        |                      | no sports club | 0.50 (1.21)    | 0.61 (1.22) | 0.62 (1.25)    |
|                                        | boys                 | total          | 0.29 (1.27)    | 0.50 (1.30) | 0.57 (1.26)    |
|                                        |                      | sports club    | 0.26 (1.12)    | 0.41 (1.19) | 0.47 (1.13)    |
|                                        |                      | no sports club | 0.34 (1.43)    | 0.60 (1.41) | 0.68 (1.40)    |
| <b>6-min run SDS (GMT)</b>             | total                |                | 0.15 (1.08)    | ND          | -0.96 (1.01)   |
|                                        | sports club total    |                | 0.47 (0.98)    | ND          | -0.68 (0.98)   |
|                                        | no sports club total |                | -0.09 (1.10)   | ND          | -1.16 (0.99)   |
|                                        | girls                | total          | 0.12 (1.03)    | ND          | -0.96 (0.98)   |
|                                        |                      | sports club    | 0.37 (0.94)    | ND          | -0.80 (1.02)   |
|                                        |                      | no sports club | -0.01 (1.05)   | ND          | -1.03 (0.96)   |
|                                        | boys                 | total          | 0.18 (1.13)    | ND          | -0.96 (1.04)   |
|                                        |                      | sports club    | 0.53 (1.00)    | ND          | -0.62 (0.94)   |
|                                        |                      | no sports club | -0.21 (1.15)   | ND          | -1.35 (1.01)   |

Sample size for anthropometric data, N = 764; for 6-min run test, N = 763. kg = kilogram, cm = centimetre, EQUI BMI (AUT) = equivalent BMI based on Austrian reference centile curves passing through adult BMI values (Mayer et al, 2015), WHO = BMI SDS based on World

Health Organization reference centile curves (de Onis et al, 2007), BMI = body mass index, SDS = standard deviation score, GMT = 6-min run SDS based on the German Motor Test (Bös et al, 2016), ND = not determined.

**eTable 5.** 3-way mixed ANOVAs for 6-min run SDS using GMT reference values

|                            |                                 | <b>Effects</b>          | <b>df</b> | <b>F</b> | <b>P Value</b> | <b><math>\eta_p^2</math></b> | <b>Power<sup>a</sup></b> |
|----------------------------|---------------------------------|-------------------------|-----------|----------|----------------|------------------------------|--------------------------|
| <b>GMT<br/>(Bös et al)</b> | Between-<br>subjects<br>effects | Gender                  | 1         | 0.451    | .502           | .001                         | .103                     |
|                            |                                 | Sports Club             | 1         | 58.080   | <.001          | .071                         | >.99                     |
|                            |                                 | Gender*Sports Club      | 1         | 10.150   | .002           | .013                         | .889                     |
|                            |                                 | Error                   | 759       |          |                |                              |                          |
|                            | Within-<br>subjects<br>effects  | Time (T1-T3)            | 1         | 1112.765 | <.001          | .595                         | >.99                     |
|                            |                                 | Time*Gender             | 1         | 0.303    | .582           | <.001                        | .085                     |
|                            |                                 | Time*Sports Club        | 1         | 1.291    | .256           | .002                         | .206                     |
|                            |                                 | Time*Gender*Sports Club | 1         | 0.918    | .338           | .001                         | .160                     |
|                            |                                 | Error (Time)            | 759       |          |                |                              |                          |

<sup>a</sup> observed power computed using alpha = .05

ANOVA = analysis of variance, df = degrees of freedom,  $\eta_p^2$  = partial eta square, GMT = 6-min run SDS based on the German Motor Test (Bös et al, 2016), SDS = standard deviation score.



**eTable 6.** Post-hoc tests for BMI SDS for the main effect time and time\*gender interaction based on the estimated marginal means

|                                |                        | Pairwise comparisons | Mean diff (95% CI)        | SE    | p-lvl | P Value <sup>a</sup> |
|--------------------------------|------------------------|----------------------|---------------------------|-------|-------|----------------------|
| <b>IOTF<br/>(Cole et al)</b>   | Time                   | T1 vs T2             | -0.124 (-0.163 to -0.085) | 0.016 | ***   | <.001                |
|                                |                        | T1 vs T3             | -0.163 (-0.203 to -0.123) | 0.017 | ***   | <.001                |
|                                |                        | T2 vs T3             | -0.039 (-0.074 to -0.003) | 0.015 | *     | .03                  |
|                                | Time*Gender<br>(Girls) | T1 vs T2             | -0.075 (-0.133 to -0.018) | 0.024 | **    | .005                 |
|                                |                        | T1 vs T3             | -0.093 (-0.152 to -0.035) | 0.024 | ***   | <.001                |
|                                |                        | T2 vs T3             | -0.018 (-0.070 to 0.034)  | 0.022 |       | 1.000                |
|                                | Time*Gender<br>(Boys)  | T1 vs T2             | -0.173 (-0.226 to -0.119) | 0.022 | ***   | <.001                |
|                                |                        | T1 vs T3             | -0.233 (-0.287 to -0.178) | 0.023 | ***   | <.001                |
|                                |                        | T2 vs T3             | -0.060 (-0.108 to -0.012) | 0.020 | **    | .009                 |
| <b>AUT<br/>(Mayer et al)</b>   | Time                   | T1 vs T2             | -0.307 (-0.413 to -0.201) | 0.044 | ***   | <.001                |
|                                |                        | T1 vs T3             | -0.428 (-0.541 to -0.314) | 0.047 | ***   | <.001                |
|                                |                        | T2 vs T3             | -0.121 (-0.211 to -0.030) | 0.038 | **    | .004                 |
|                                | Time*Gender<br>(Girls) | T1 vs T2             | -0.141 (-0.296 to 0.014)  | 0.065 |       | .09                  |
|                                |                        | T1 vs T3             | -0.223 (-0.388 to -0.057) | 0.069 | **    | .004                 |
|                                |                        | T2 vs T3             | -0.082 (-0.215 to 0.050)  | 0.055 |       | .41                  |
|                                | Time*Gender<br>(Boys)  | T1 vs T2             | -0.473 (-0.617 to -0.329) | 0.060 | ***   | <.001                |
|                                |                        | T1 vs T3             | -0.632 (-0.786 to -0.478) | 0.064 | ***   | <.001                |
|                                |                        | T2 vs T3             | -0.159 (-0.283 to -0.036) | 0.051 | **    | .006                 |
| <b>WHO<br/>(de Onis et al)</b> | Time                   | T1 vs T2             | -0.143 (-0.187 to -0.099) | 0.018 | ***   | <.001                |
|                                |                        | T1 vs T3             | -0.190 (-0.235 to -0.144) | 0.019 | ***   | <.001                |
|                                |                        | T2 vs T3             | -0.047 (-0.087 to -0.007) | 0.019 | *     | .01                  |
|                                | Time*Gender<br>(Girls) | T1 vs T2             | -0.076 (-0.141 to -0.012) | 0.027 | *     | .01                  |
|                                |                        | T1 vs T3             | -0.099 (-0.165 to -0.033) | 0.028 | ***   | <.001                |
|                                |                        | T2 vs T3             | -0.022 (-0.081 to 0.036)  | 0.024 |       | 1.00                 |
|                                | Time*Gender<br>(Boys)  | T1 vs T2             | -0.209 (-0.269 to -0.149) | 0.025 | ***   | <.001                |
|                                |                        | T1 vs T3             | -0.280 (-0.342 to -0.219) | 0.026 | ***   | <.001                |
|                                |                        | T2 vs T3             | -0.071 (-0.125 to -0.017) | 0.023 | **    | .005                 |

<sup>a</sup> adjusted for multiple comparisons using Bonferroni correction.

p-lvl (P Value level) \* =  $P < .05$ , \* =  $P < .01$ , \* =  $P < .001$ , BMI = body mass index, CI = confidence interval, AUT = equivalent BMI based on Austrian reference centile curves passing through adult BMI values (Mayer et al, 2015), IOTF = BMI SDS based on International Obesity Taskforce reference centile curves (Cole et al, 2012), Mean diff = mean difference based on the estimated marginal means, p-lvl = significance level, SDS = standard deviation score, SE = standard error, T1= baseline measurements in Sept and Oct 2019, T2 = follow-up measurements in May and Jun 2020, T2 = follow-up measurements in Sep and Oct 2020, WHO = BMI SDS based on World Health Organization reference centile curves (de Onis et al, 2007).

**eTable 7.** 3-way mixed ANOVAs for BMI SDS using Austrian and WHO reference values

|                                      |                          | <b>Effects</b>          | <b>df</b> | <b>F</b> | <b>P Value</b> | <b><math>\eta_p^2</math></b> | <b>Power<sup>a</sup></b> |
|--------------------------------------|--------------------------|-------------------------|-----------|----------|----------------|------------------------------|--------------------------|
| <b>AUT</b><br><b>(Mayer et al)</b>   | Between-subjects effects | Gender                  | 1         | 7.22     | .007           | .009                         | .77                      |
|                                      |                          | Sports Club             | 1         | 10.27    | .001           | .013                         | .89                      |
|                                      |                          | Gender*Sports Club      | 1         | 0.2      | .60            | <.001                        | .08                      |
|                                      |                          | Error                   | 760       |          |                |                              |                          |
|                                      | Within-subjects effects  | Time (T1-T2-T3)         | 1.88      | 52.192   | <.001          | .064                         | >.99                     |
|                                      |                          | Time*Gender             | 1.88      | 12.73    | <.001          | .016                         | >.99                     |
|                                      |                          | Time*Sports Club        | 1.88      | 5.71     | .004           | .007                         | .85                      |
|                                      |                          | Time*Gender*Sports Club | 1.88      | 2.32     | .10            | .003                         | .46                      |
|                                      |                          | Error (Time)            | 1429.15   |          |                |                              |                          |
| <b>WHO</b><br><b>(de Onis et al)</b> | Between-subjects effects | Gender                  | 1         | 0.22     | .64            | <.001                        | .08                      |
|                                      |                          | Sports Club             | 1         | 6.91     | .009           | .009                         | .75                      |
|                                      |                          | Gender*Sports Club      | 1         | 0.81     | .37            | .001                         | .15                      |
|                                      |                          | Error                   | 760       |          |                |                              |                          |
|                                      | Within-subjects effects  | Time (T1-T2-T3)         | 1.95      | 60.66    | <.001          | .074                         | >.99                     |
|                                      |                          | Time*Gender             | 1.95      | 13.70    | <.001          | .018                         | >.99                     |
|                                      |                          | Time*Sports Club        | 1.95      | 3.84     | .02            | .005                         | .69                      |
|                                      |                          | Time*Gender*Sports Club | 1.95      | 0.63     | .53            | .001                         | .15                      |
|                                      |                          | Error (Time)            | 1484.95   |          |                |                              |                          |

<sup>a</sup> observed power computed using alpha = .05

ANOVA = analysis of variance, AUT = equivalent BMI based on Austrian reference centile curves passing through adult BMI values (Mayer et al, 2015), BMI = body mass index, df = degrees of freedom,  $\eta_p^2$  = partial eta square, SDS = standard deviation score, WHO = BMI SDS based on World Health Organization reference centile curves (de Onis et al, 2007).

**eTable 8.** Cochran's Q Test for dichotomous BMI classification using IOTF, Austrian and WHO reference values

|                               |       | <b>n</b> | <b>Q</b> | <b>df</b> | <b>p-lvl</b> | <b>P Value</b> |
|-------------------------------|-------|----------|----------|-----------|--------------|----------------|
| <b>IOTF</b><br>(Cole et al)   | total | 764      | 18.029   | 2         | ***          | <.001          |
|                               | girls | 383      | 5.143    | 2         |              | .08            |
|                               | boys  | 381      | 15.500   | 2         | ***          | <.001          |
| <b>AUT</b><br>(Mayer et al)   | total | 764      | 27.360   | 2         | ***          | <.001          |
|                               | girls | 383      | 13.364   | 2         | **           | .001           |
|                               | boys  | 381      | 15.643   | 2         | ***          | <.001          |
| <b>WHO</b><br>(de Onis et al) | total | 764      | 29.216   | 2         | ***          | <.001          |
|                               | girls | 383      | 3.526    | 2         |              | .17            |
|                               | boys  | 381      | 31.051   | 2         | ***          | <.001          |

p-lvl (*P* Value level) \* =  $P < .05$ , \*\* =  $P < .01$ , \*\*\* =  $P < .001$ , AUT = Austrian reference values using centile curves for BMI 25.00 at the age of 18 as thresholds for overweight and above (Mayer et al, 2015), BMI = body mass index, Q = Cochran's Q test statistic, df = degree of freedom, IOTF = International Obesity Taskforce reference values using centile curves for BMI 25.00 at the age of 18 as thresholds for overweight and above (Cole et al, 2012), p-lvl = significance level, SDS = standard deviation score, WHO = World Health Organization reference values using +1 SDS percentiles as thresholds for overweight and above (de Onis et al, 2007).

**eTable 9.** Post-hoc tests for dichotomous BMI classification using IOTF, Austrian and WHO reference values

|                                |       | <b>Pairwise comparison</b> | <b>STS</b> | <b>SE</b> | <b>p-lvl</b> | <b>P Value<sup>b</sup></b> |
|--------------------------------|-------|----------------------------|------------|-----------|--------------|----------------------------|
| <b>IOTF<br/>(Cole et al)</b>   | total | T1 vs T2                   | 2.049      | 0.009     |              | .12                        |
|                                |       | T1 vs T3                   | 4.245      | 0.009     | ***          | <.001                      |
|                                |       | T2 vs T3                   | 2.196      | 0.009     |              | .08                        |
|                                | girls | T1 vs T2 <sup>a</sup>      |            |           |              |                            |
|                                |       | T1 vs T3 <sup>a</sup>      |            |           |              |                            |
|                                |       | T2 vs T3 <sup>a</sup>      |            |           |              |                            |
|                                | boys  | T1 vs T2                   | 1.852      | 0.011     |              | .19                        |
|                                |       | T1 vs T3                   | 3.935      | 0.011     | ***          | <.001                      |
|                                |       | T2 vs T3                   | 2.083      | 0.011     |              | .11                        |
| <b>AUT<br/>(Mayer et al)</b>   | total | T1 vs T2                   | 3.118      | 0.008     | **           | .005                       |
|                                |       | T1 vs T3                   | 5.196      | 0.008     | ***          | <.001                      |
|                                |       | T2 vs T3                   | 2.078      | 0.008     |              | .11                        |
|                                | girls | T1 vs T2                   | 2.872      | 0.010     | *            | .01                        |
|                                |       | T1 vs T3                   | 3.395      | 0.010     | **           | .002                       |
|                                |       | T2 vs T3                   | 0.522      | 0.010     |              | >.99                       |
|                                | boys  | T1 vs T2                   | 1.620      | 0.011     |              | .32                        |
|                                |       | T1 vs T3                   | 3.935      | 0.011     | ***          | <.001                      |
|                                |       | T2 vs T3                   | 2.315      | 0.011     |              | .06                        |
| <b>WHO<br/>(de Onis et al)</b> | total | T1 vs T2                   | 4.104      | 0.011     | ***          | <.001                      |
|                                |       | T1 vs T3                   | 5.099      | 0.011     | ***          | <.001                      |
|                                |       | T2 vs T3                   | 0.995      | 0.011     |              | .96                        |
|                                | girls | T1 vs T2 <sup>a</sup>      |            |           |              |                            |
|                                |       | T1 vs T3 <sup>a</sup>      |            |           |              |                            |
|                                |       | T2 vs T3 <sup>a</sup>      |            |           |              |                            |
|                                | boys  | T1 vs T2                   | 3.827      | 0.016     | ***          | <.001                      |
|                                |       | T1 vs T3                   | 5.421      | 0.016     | ***          | <.001                      |
|                                |       | T2 vs T3                   | 1.594      | 0.016     |              | .33                        |

<sup>a</sup> pairwise comparisons were not performed due to non-significant omnibus test.

<sup>b</sup> adjusted for multiple comparisons using Bonferroni correction.

p-lvl (*P* Value level) \* =  $P < .05$ , \* =  $P < .01$ , \* =  $P < .001$ , AUT = Austrian reference values using centile curves for BMI 25.00 at the age of 18 as thresholds for overweight and above (Mayer et al, 2015), BMI = body mass index, IOTF = International Obesity Taskforce reference values using centile curves for BMI 25.00 at the age of 18 as thresholds for overweight and above (Cole et al, 2012), p-lvl = significance level, SDS = standard deviation score, SE = standard error, STS = standard test statistic, T1= baseline measurements in Sept and Oct 2019, T2 = follow-up measurements in May and Jun 2020, T3 = follow-up measurements in Sep and Oct 2020, WHO = World Health Organization reference values using +1 SDS percentiles as thresholds for overweight and above (de Onis et al, 2007).

**eTable 10.** Cochran's Q Test for dichotomous BMI classification using IOTF, Austrian and WHO reference values

|                                |       |                | <b>n</b> | <b>Q</b> | <b>df</b> | <b>p-lvl</b> | <b>P Value</b> |
|--------------------------------|-------|----------------|----------|----------|-----------|--------------|----------------|
| <b>IOTF<br/>(Cole et al)</b>   | girls | sports club    | 119      | 3.733    | 2         |              | .16            |
|                                |       | no sports club | 264      | 2.074    | 2         |              | .36            |
|                                | boys  | sports club    | 203      | 6.533    | 2         | *            | .04            |
|                                |       | no sports club | 178      | 9.385    | 2         | **           | .009           |
| <b>AUT<br/>(Mayer et al)</b>   | girls | sports club    | 119      | 7.714    | 2         | *            | .02            |
|                                |       | no sports club | 264      | 7.600    | 2         | *            | .02            |
|                                | boys  | sports club    | 203      | 4.933    | 2         |              | .09            |
|                                |       | no sports club | 178      | 11.692   | 2         | **           | .003           |
| <b>WHO<br/>(de Onis et al)</b> | girls | sports club    | 119      | 1.273    | 2         |              | .53            |
|                                |       | no sports club | 264      | 2.741    | 2         |              | .25            |
|                                | boys  | sports club    | 203      | 9.484    | 2         | **           | .009           |
|                                |       | no sports club | 178      | 24.071   | 2         | ***          | <.001          |

p-lvl (P Value level) \* =  $P < .05$ , \* =  $P < .01$ , \* =  $P < .001$ , AUT = Austrian reference values using centile curves for BMI 25.00 at the age of 18 as thresholds for overweight and above (Mayer et al, 2015), BMI = body mass index, Q = Cochran's Q test statistic, df = degree of freedom, IOTF = International Obesity Taskforce reference values using centile curves for BMI 25.00 at the age of 18 as thresholds for overweight and above (Cole et al, 2012), p-lvl = significance level, SDS = standard deviation score, WHO = World Health Organization reference values using +1 SDS percentiles as thresholds for overweight and above (de Onis et al, 2007).

**eTable 11.** Post-hoc tests for dichotomous BMI classification using IOTF, Austrian and WHO reference values

|                                |       |                | <b>Pairwise comparison</b> | <b>STS</b> | <b>SE</b> | <b>p-lvl</b> | <b>P Value<sup>b</sup></b> |  |
|--------------------------------|-------|----------------|----------------------------|------------|-----------|--------------|----------------------------|--|
| <b>IOTF<br/>(Cole et al)</b>   | girls | sports club    | T1 vs T2 <sup>a</sup>      |            |           |              |                            |  |
|                                |       |                | T1 vs T3 <sup>a</sup>      |            |           |              |                            |  |
|                                |       |                | T2 vs T3 <sup>a</sup>      |            |           |              |                            |  |
|                                |       | no sports club | T1 vs T2 <sup>a</sup>      |            |           |              |                            |  |
|                                |       |                | T1 vs T3 <sup>a</sup>      |            |           |              |                            |  |
|                                |       |                | T2 vs T3 <sup>a</sup>      |            |           |              |                            |  |
|                                | boys  | sports club    | T1 vs T2                   | -0.949     | 0.016     |              | >.99                       |  |
|                                |       |                | T1 vs T3                   | -2.530     | 0.016     | *            | .03                        |  |
|                                |       |                | T2 vs T3                   | -1.581     | 0.016     |              | .34                        |  |
|                                |       | no sports club | T1 vs T2                   | -1.698     | 0.017     |              | .27                        |  |
|                                |       |                | T1 vs T3                   | -3.057     | 0.017     | **           | .007                       |  |
|                                |       |                | T2 vs T3                   | -1.359     | 0.017     |              | .52                        |  |
| <b>AUT<br/>(Mayer et al)</b>   | girls | sports club    | T1 vs T2                   | 1.389      | 0.018     |              | .50                        |  |
|                                |       |                | T1 vs T3                   | 2.777      | 0.018     | *            | .02                        |  |
|                                |       |                | T2 vs T3                   | 1.389      | 0.018     |              | .50                        |  |
|                                |       | no sports club | T1 vs T2                   | 2.530      | 0.012     | *            | .03                        |  |
|                                |       |                | T1 vs T3                   | 2.214      | 0.012     |              | .08                        |  |
|                                |       |                | T2 vs T3                   | -0.316     | 0.012     |              | >.99                       |  |
|                                | boys  | sports club    | T1 vs T2 <sup>a</sup>      |            |           |              |                            |  |
|                                |       |                | T1 vs T3 <sup>a</sup>      |            |           |              |                            |  |
|                                |       |                | T2 vs T3 <sup>a</sup>      |            |           |              |                            |  |
|                                |       | no sports club | T1 vs T2                   | -1.359     | 0.017     |              | .52                        |  |
|                                |       |                | T1 vs T3                   | -3.397     | 0.017     | **           | .002                       |  |
|                                |       |                | T2 vs T3                   | -2.038     | 0.017     |              | .13                        |  |
| <b>WHO<br/>(de Onis et al)</b> | girls | sports club    | T1 vs T2 <sup>a</sup>      |            |           |              |                            |  |
|                                |       |                | T1 vs T3 <sup>a</sup>      |            |           |              |                            |  |
|                                |       |                | T2 vs T3 <sup>a</sup>      |            |           |              |                            |  |
|                                |       | no sports club | T1 vs T2 <sup>a</sup>      |            |           |              |                            |  |
|                                |       |                | T1 vs T3 <sup>a</sup>      |            |           |              |                            |  |
|                                |       |                | T2 vs T3 <sup>a</sup>      |            |           |              |                            |  |
|                                | boys  | sports club    | T1 vs T2                   | -2.420     | 0.022     | *            | .047                       |  |
|                                |       |                | T1 vs T3                   | -2.860     | 0.022     | *            | .013                       |  |
|                                |       |                | T2 vs T3                   | -0.440     | 0.022     |              | >.99                       |  |
|                                |       | no sports club | T1 vs T2                   | -3.009     | 0.024     | **           | .008                       |  |
|                                |       |                | T1 vs T3                   | -4.861     | 0.024     | ***          | <.001                      |  |
|                                |       |                | T2 vs T3                   | -1.852     | 0.024     |              | .19                        |  |

<sup>a</sup> pairwise comparisons were not performed due to non-significant omnibus test.

<sup>b</sup> adjusted for multiple comparisons using Bonferroni correction.

p-lvl (*P* Value level) \* =  $P < .05$ , \* =  $P < .01$ , \* =  $P < .001$ , AUT = Austrian reference values using centile curves for BMI 25.00 at the age of 18 as thresholds for overweight and above (Mayer et al, 2015), BMI = body mass index, IOTF = International Obesity Taskforce reference values using centile curves for BMI 25.00 at the age of 18 as thresholds for overweight and above (Cole et al, 2012), p-lvl = significance level, SDS = standard deviation score, SE = standard error, STS = standard test statistic, T1= baseline measurements in Sept and Oct 2019, T2 = follow-up measurements in May and Jun 2020, T3 = follow-up measurements in Sep and Oct 2020, WHO = World Health Organization reference values using +1 SDS percentiles as thresholds for overweight and above (de Onis et al, 2007).

**eTable 12.** Children with overweight and obesity using Austrian and WHO reference thresholds

|                             |                              | <b>September 2019</b> | <b>June 2020</b> | <b>September 2020</b> |
|-----------------------------|------------------------------|-----------------------|------------------|-----------------------|
|                             |                              | <b>ow+ob</b>          | <b>ow+ob</b>     | <b>ow+ob</b>          |
|                             |                              | <b>No. (%)</b>        | <b>No. (%)</b>   | <b>No. (%)</b>        |
| <b>BMI categories (AUT)</b> | total (n=764)                | 114 (14.9%)           | 132 (17.3%)      | 144 (18.8%)           |
|                             | sports club total (n=322)    | 38 (11.8%)            | 44 (13.7%)       | 51 (15.8%)            |
|                             | no sports club total (n=442) | 76 (17.2%)            | 88 (19.9%)       | 93 (21.0%)            |
|                             | girls total (n=383)          | 57 (14.9 %)           | 68 (17.8 %)      | 70 (18.3 %)           |
|                             | girls sports club (n=119)    | 10 (8.4 %)            | 13 (10.9 %)      | 16 (13.4 %)           |
|                             | girls no sports club (n=264) | 47 (17.8 %)           | 55 (20.8 %)      | 54 (20.5 %)           |
|                             | boys total (n=381)           | 57 (15.0 %)           | 64 (16.8 %)      | 74 (19.4 %)           |
|                             | boys sports club (n=203)     | 28 (13.8 %)           | 31 (15.3 %)      | 35 (17.2 %)           |
|                             | boys no sports club (n=178)  | 29 (16.3 %)           | 33 (18.5 %)      | 39 (21.9 %)           |
| <b>BMI categories (WHO)</b> | total (n=764)                | 202 (26.4%)           | 235 (30.8%)      | 243 (31.8%)           |
|                             | sports club total (n=322)    | 76 (22.6%)            | 89 (27.6%)       | 92 (28.68%)           |
|                             | no sports club total (n=442) | 126 (28.5%)           | 146 (33.0%)      | 151 (34.2%)           |
|                             | girls total (n=383)          | 112 (29.2 %)          | 121 (31.6 %)     | 119 (31.1 %)          |
|                             | girls sports club (n=119)    | 28 (23.5 %)           | 30 (25.2 %)      | 31 (26.1 %)           |
|                             | girls no sports club (n=264) | 84 (31.8 %)           | 91 (34.5 %)      | 88 (33.3 %)           |
|                             | boys total (n=381)           | 90 (23.6 %)           | 114 (29.9 %)     | 124 (32.5 %)          |
|                             | boys sports club (n=203)     | 48 (23.6 %)           | 59 (29.1 %)      | 61 (30.0 %)           |
|                             | boys no sports club (n=178)  | 42 (23.6 %)           | 55 (30.9 %)      | 63 (35.4 %)           |

AUT = Austrian reference values using centile curves for BMI 25.00 at the age of 18 as thresholds for overweight and above (Mayer et al, 2015), BMI = body mass index, SDS = standard deviation score, ow+ob = overweight including obesity, WHO = World Health Organization reference values using +1 SDS percentiles as thresholds for overweight and above (de Onis et al, 2007). No. = absolute number;

**eFigure 1.** COVID-19 restrictions in Austria between January 31, 2020 and September 30, 2020

**eFigure 1A.** Restriction levels for primary school children.

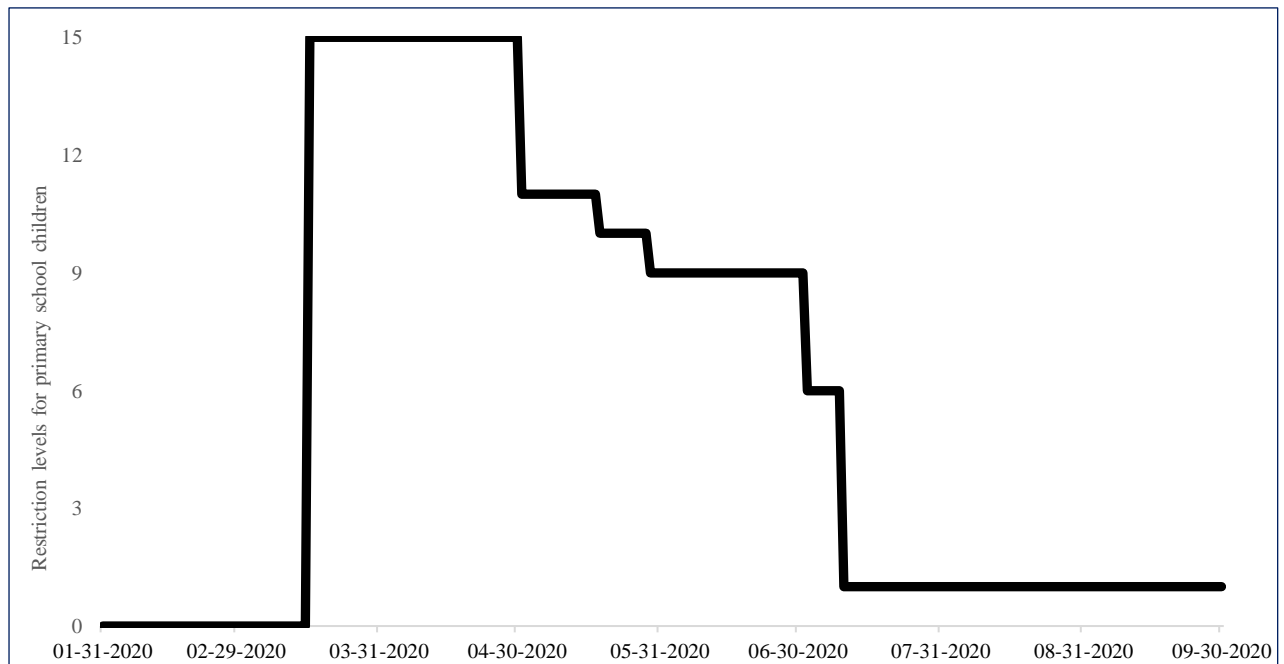

**eFigure 1B.** OxCGRT - Stringency Index.

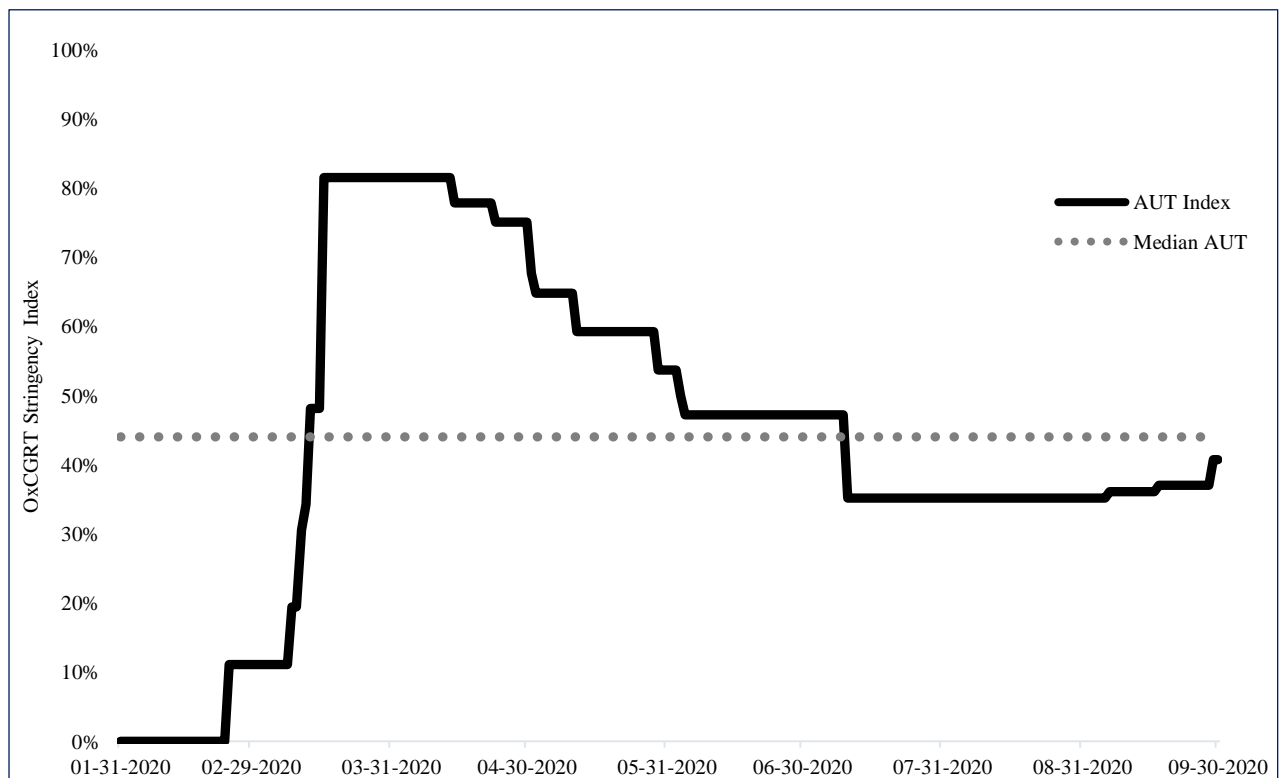

The detailed description of this classification method used in Figure 1A is available in eTable 1. Figure 1B shows the Oxford COVID-19 Government Response Tracker (OxCGRT) Stringency Index for Austria between January 31, 2020 and September 30, 2020.



**eFigure 2.** Percentage of overweight and obese children according to IOTF thresholds for girls and boys by sports club membership

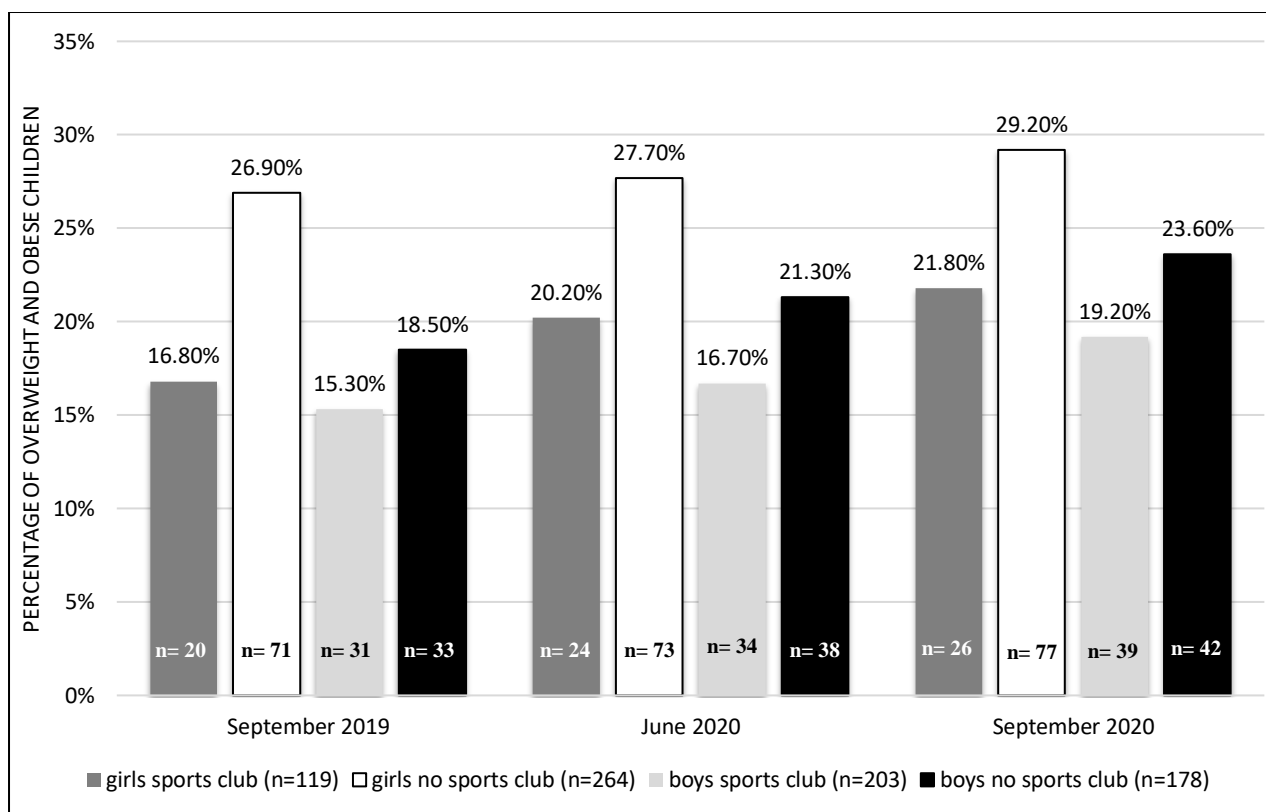

Supplement: jamanetwopen-e2121675-s001.pdf [file jamanetwopen-e2121675-s001.pdf]
